# Supplementary material
Source: PubMed Central journal article supplement (PMC3879626)
Supplement: supp_M113.031278_mcp.M113.031278-1.pdf [file supp_M113.031278_mcp.M113.031278-1.pdf]

# Supplementary Material

## Automated label-free quantification of metabolites from LC-MS data

Erhan Kenar<sup>a\*</sup> (kenar@informatik.uni-tuebingen.de)

Holger Franken<sup>b\*</sup> (mail@holgerfranken.de)

Sara Forcisi<sup>c</sup> (sara.forcisi@helmholtz-muenchen.de)

Kilian Wörmann<sup>c</sup> (kilian.woermann@gmail.com)

Hans-Ulrich Häring<sup>e,f</sup> (Hans-Ulrich.Haering@med.uni-tuebingen.de)

Rainer Lehmann<sup>d,e,f</sup> (Rainer.Lehmann@med.uni-tuebingen.de)

Philippe Schmitt-Kopplin<sup>c,f</sup> (schmitt-kopplin@helmholtz-muenchen.de)

Andreas Zell<sup>b</sup> (andreas.zell@uni-tuebingen.de)

Oliver Kohlbacher<sup>a</sup> (oliver.kohlbacher@uni-tuebingen.de)

<sup>a</sup> Applied Bioinformatics, Center for Bioinformatics, Quantitative Biology Center, and Department of Computer Science, University of Tuebingen, Sand 14, 72076 Tuebingen, Germany.

<sup>b</sup> Cognitive Systems, Department of Computer Science, University of Tuebingen, Sand 1, 72076 Tuebingen, Germany.

<sup>c</sup> Research Unit Analytical BioGeoChemistry, German Research Center for Environmental Health, Helmholtz Zentrum München, Ingolstädter Landstraße 1, 85764 Neuherberg, Germany.

<sup>d</sup> Division of Clinical Chemistry and Pathobiochemistry (Central Laboratory), University Hospital Tuebingen, 72076 Tuebingen, Germany

<sup>e</sup> Institute for Diabetes Research and Metabolic Diseases (IDM) of the Helmholtz Center Munich at the University of Tuebingen (Paul Langerhans Institute Tuebingen), 72076 Tuebingen, Germany

<sup>f</sup> German Center for Diabetes Research (DZD), Germany

\* These authors contributed equally.

## List of figures and tables

|                                                                                                                                                                        |    |
|------------------------------------------------------------------------------------------------------------------------------------------------------------------------|----|
| <i>S 1: General outline of a computational pipeline employed for metabolomics data analysis.</i>                                                                       | 3  |
| <i>S 2: Separation of chromatographic peaks within the same mass trace.</i>                                                                                            | 4  |
| <i>S 3: Characteristics of a metabolite isotope pattern measured in LC-MS.</i>                                                                                         | 5  |
| <i>S 4: User-adjustable parameters of the FeatureFinderMetabo tool.</i>                                                                                                | 6  |
| <i>S 5: Parameter settings of MSSimulator.</i>                                                                                                                         | 7  |
| <i>S 6: Detection parameters applied for MS measurements in positive ESI mode.</i>                                                                                     | 8  |
| <i>S 7: Feature finding performance with respect to varying degrees of simulated detector noise.</i>                                                                   | 10 |
| <i>S 8: Feature finding performance comparison with respect to varying settings of the mass_error_ppm parameter.</i>                                                   | 11 |
| <i>S 9: Feature finding performance with respect to varying settings of the chrom_fwhm parameter.</i>                                                                  | 12 |
| <i>S 10: Feature intensities for spiked-in compounds.</i>                                                                                                              | 13 |
| <i>S 11: Relationship between stock solution concentrations and feature intensities for Propionyl-L-carnitine-d3, Nialamide, Sulfadimethoxine, and Reserpine.</i>      | 15 |
| <i>S 12: Relationship between stock solution concentrations and feature intensities for Terfenadine, Hexadecanoyl-L-carnitine-d3, and Octadecanoyl-L-carnitine-d3.</i> | 16 |
| <i>S 13: Snapshot of the INIFileEditor window.</i>                                                                                                                     | 17 |

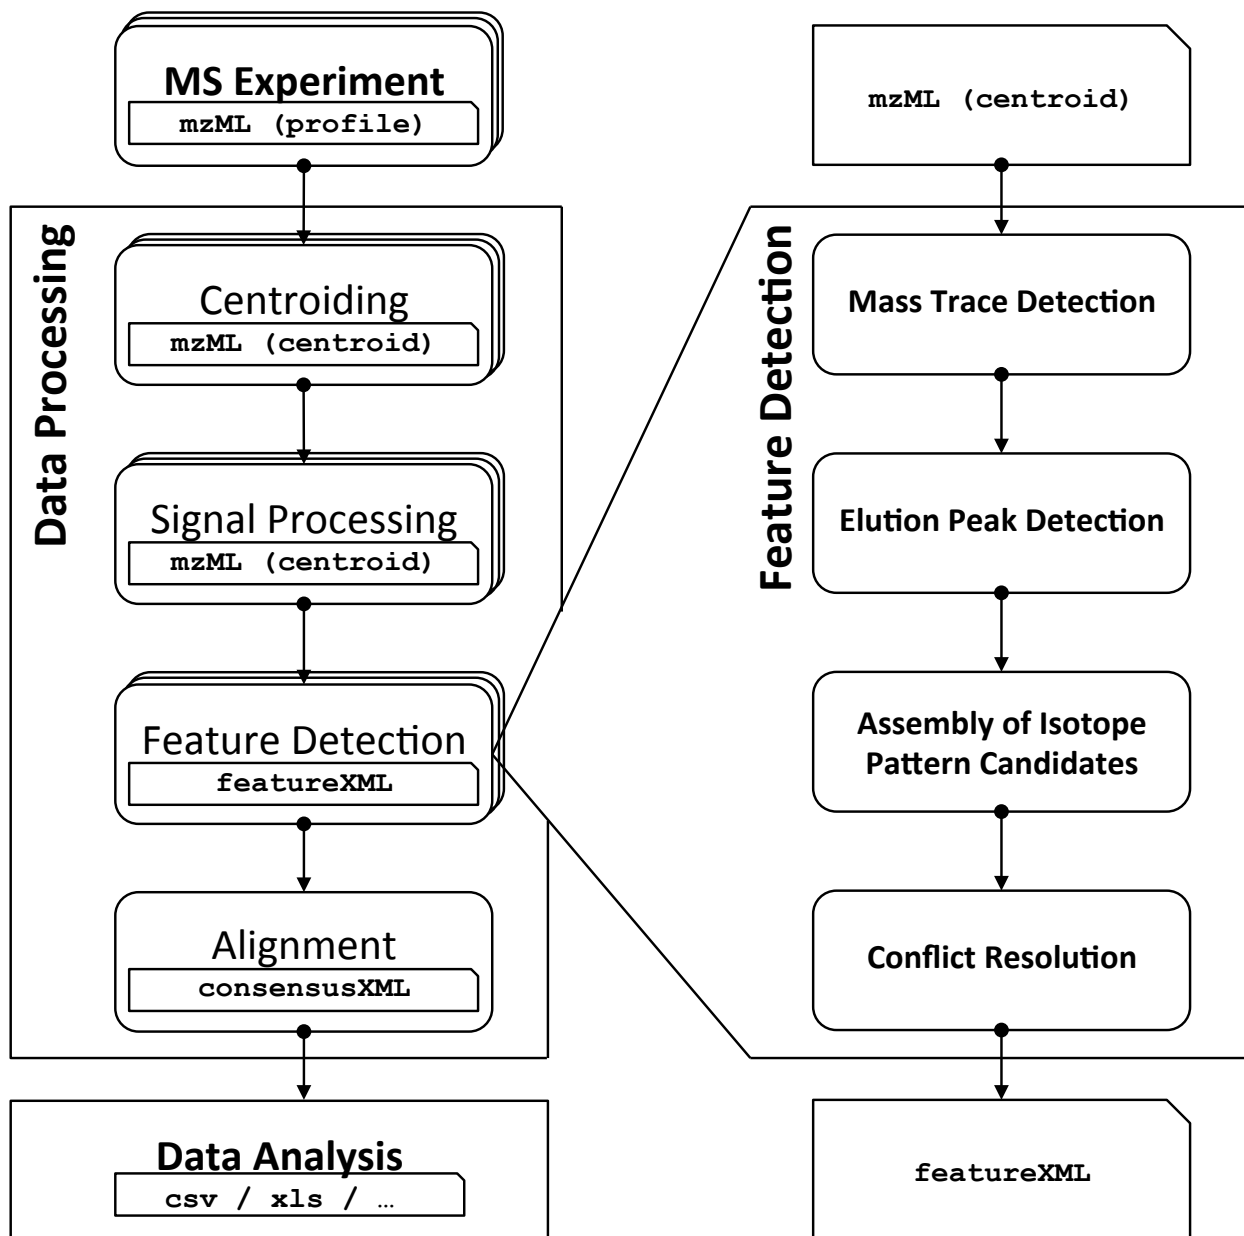

**S 1: General outline of a computational pipeline employed for metabolomics data analysis.** The first three steps (centroiding, signal processing (e.g., mass recalibration), and feature detection) are applied to all MS experiments individually. Each processed experiment results in a condensed representation (featureXML), respectively. In the final alignment step, all featureXML files are merged to a single consensusXML file, which may be exported to comma-separated value (CSV) format for further analysis.

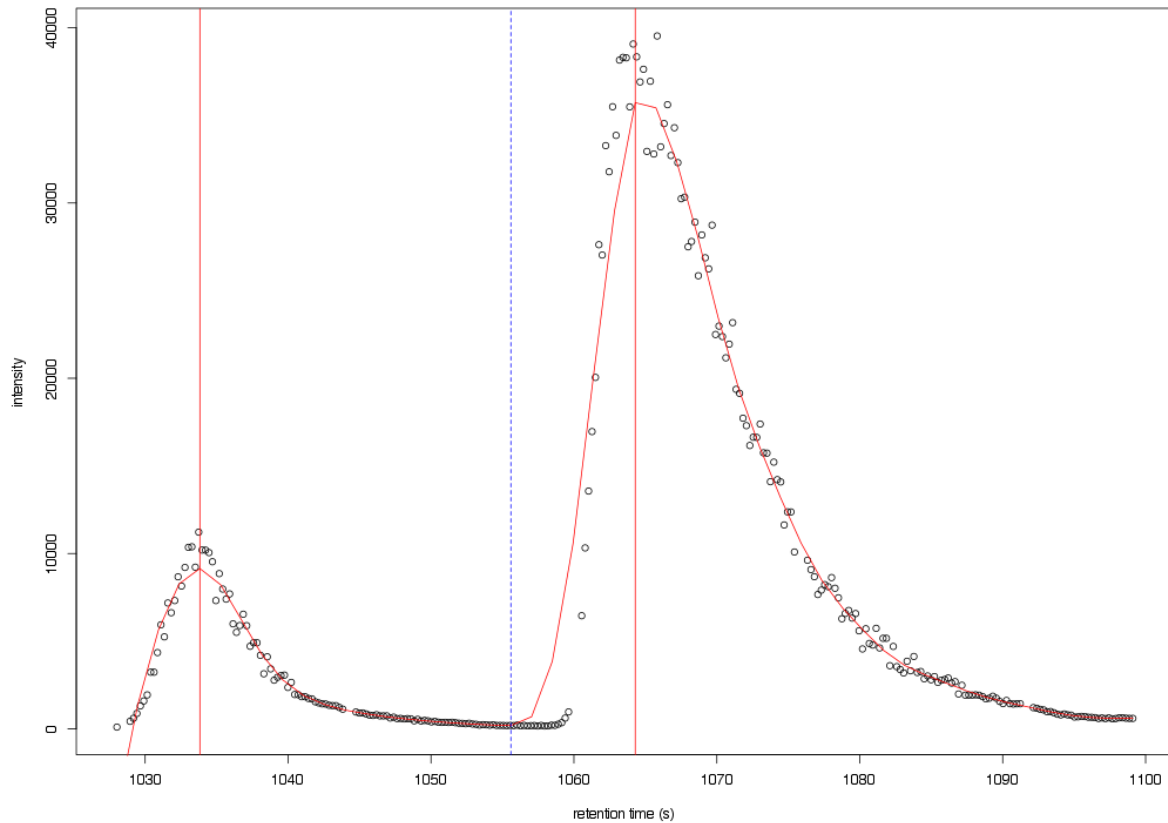

**S 2: Separation of chromatographic peaks within the same mass trace.** A smoothed multimodal mass trace (red line) is scanned for time points corresponding to local intensity maxima. Two vertical red lines indicate apex peaks that show higher intensity than at least  $k/2$  neighboring peaks. The split into two separate mass traces is done at the time point with minimum intensity between these apices (dashed blue line).

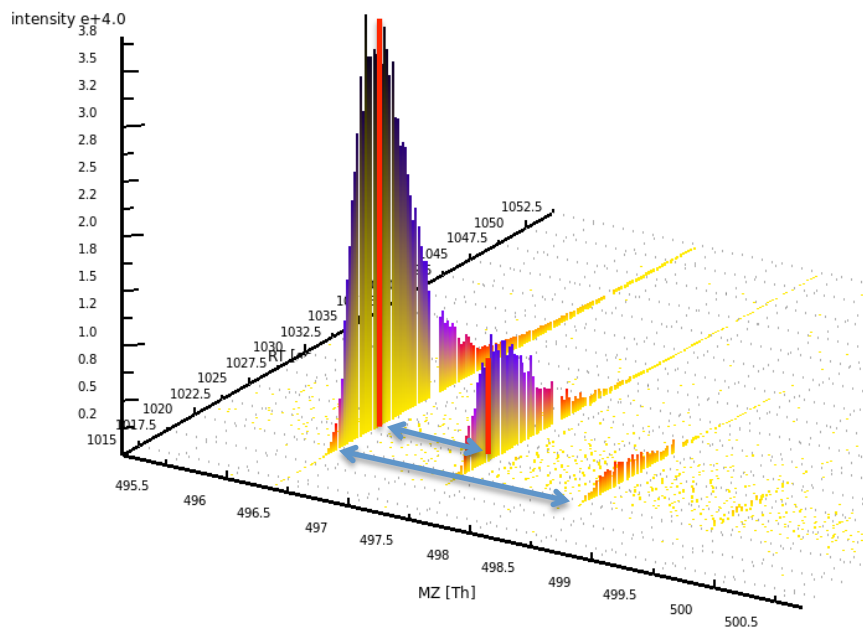

**S 3: Characteristics of a metabolite isotope pattern measured in LC-MS.** In a typical isotope pattern, mass traces belonging to the monoisotopic and higher isotopic ions can be observed. The relationships between these mass traces are characteristic for any naturally occurring isotope pattern: The m/z distances between each satellite and the monoisotopic trace (blue arrows), the coelution of trace profiles (apexes indicated as red lines), and the intensity ratios between satellite traces and monoisotopic trace.

**S 4: User-adjustable parameters of the FeatureFinderMetabo tool.**

| <b>Parameter</b>           | <b>Description</b>                                                                                        | <b>Default value</b> |
|----------------------------|-----------------------------------------------------------------------------------------------------------|----------------------|
| <i>mass_error_ppm</i>      | Allowed mass error deviation in ppm (mass trace detection stage)                                          | 20                   |
| <i>chrom_fwhm</i>          | A chromatographic peak's expected full-width-at-half-maximum in seconds (chromatographic peak separation) | 5                    |
| <i>noise_threshold_int</i> | Intensity threshold below which signals are regarded as noise                                             | 10                   |
| <i>chrom_peak_snr</i>      | The minimum signal-to-noise a mass trace should have.                                                     | 3                    |

**S 5: Parameter settings of MSSimulator.** The first nine parameters are common to all simulated datasets.

Regarding the detector noise, m/z variation, and elution profile distortion experiments, further settings for noise-specific parameters are shown.

| MSSimulator parameter name                 | detector noise                                      | m/z variation                               | elution profile distortion |
|--------------------------------------------|-----------------------------------------------------|---------------------------------------------|----------------------------|
| RT:total_gradient_time [s]                 | 1500                                                |                                             |                            |
| RT:sampling_rate [s]                       | 0.25                                                |                                             |                            |
| RT:scan_window:min [s]                     | 0                                                   |                                             |                            |
| RT:scan_window:max [s]                     | 1500                                                |                                             |                            |
| RawSignal:resolution:value                 | 20000                                               |                                             |                            |
| RawSignal:resolution:type                  | constant                                            |                                             |                            |
| RawSignal:variation:intensity:scale        | 1                                                   |                                             |                            |
| Ionization:mz:lower_measurement_limit [Da] | 100                                                 |                                             |                            |
| Ionization:mz:upper_measurement_limit [Da] | 1000                                                |                                             |                            |
| RawSignal:noise:detector:stddev [counts]   | 0, 3, 5, 10, 12, 15, 20, 25,<br>30, 40, 50, 70, 100 | 0                                           | 0                          |
| RawSignal:variation:mz:error_stddev [ppm]  | 0                                                   | 0, 5, 10, 15, 20, 25, 30,<br>35, 40, 45, 50 | 0                          |
| RT:column_condition:distortion             | 0                                                   | 0                                           | 0, 10                      |

**S 6: Detection parameters applied for MS measurements in positive ESI mode.**

| <b>Detection parameters</b>         | <b>Positive ESI</b> |
|-------------------------------------|---------------------|
| <b>Capillary voltage (kV)</b>       | 3.10                |
| <b>Sample cone (V)</b>              | 30.00               |
| <b>Extraction cone</b>              | 4.00                |
| <b>Source temperature</b>           | 120                 |
| <b>Desolvation temperature (°C)</b> | 300                 |
| <b>Desolvation flow (L/h)</b>       | 800                 |
| <b>Cone (L/h)</b>                   | 50                  |
| <b>Detector (V)</b>                 | 1800                |



## Recall, precision, and robustness of the algorithm

In this section, we give further details about the benchmark results based on the simulated datasets. The parameter names used in the text correspond to those used in the algorithm.

In the first experiment, we examined the influence of the `noise_threshold_int` parameter by adjusting it to each simulated detector noise level (`noise_threshold_int =  $\sigma_{det}$` ). For low detector noise levels, our algorithm achieves its maximum F-score of 0.96 (see Figure S 7). Above  $\sigma_{det} = 5$ , the performance decreases moderately until reaching 0.62 on the highest noise level  $\sigma_{det} = 100$ . When filtering out mass spectrometric peaks by increasing `noise_threshold_int`, potential feature candidates are not considered and, thus, the observed decline of the F-score results primarily from the decrease of the feature recall rate.

We studied the impact of under- and overestimating the mass error inherent in the data by considering two datasets each simulated with a specific mass error and varying configurations of the `mass_error_ppm` parameter (see Figure S 8). For a simulated m/z error  $\sigma_{m/z}$  of 10 ppm (Figure S 8, left plot), the algorithm achieves an F-score of 0.97 when `mass_error_ppm` is set accordingly. In comparison, we observe a similar performance for a simulated m/z error  $\sigma_{m/z}$  of 40 ppm (Figure S 8, right plot). The performance plots in Figure S 8 suggest that the algorithm's performance is insensitive to moderate underestimation of the `mass_error_ppm` parameter. In case of overestimation, the performance remains stable on a high level comparable to the F-score yielded by the optimal settings due to the dynamic re-estimation of `mass_error_ppm`.

Analogously, we assessed the robustness of the `chrom_fwhm` parameter for elution profiles simulated with heavy distortion (see Figure S 9). Based on the distribution of all simulated elution profiles, we estimated an average chromatographic peak width of eight seconds. The algorithm achieves its maximum performance of 0.9 for `chrom_fwhm = 8 s` and remains stable for higher settings. For settings below eight seconds, the algorithm's performance decreases slightly until approximately four seconds and more steeply below this mark. This drop in

performance is due to the loss of feature precision rate since very low settings of `chrom_fwhm` lead to insufficient smoothing of the distorted elution profiles and thus to their fragmentation. However, the performance plots reveal that the F-score remains insensitive to sharp changes within a rather broad margin of values lower than the optimal `chrom_fwhm` setting (between four and eight seconds). This suggests that the algorithm allows for good performance in a robust manner even if `chrom_fwhm` is moderately underestimated.

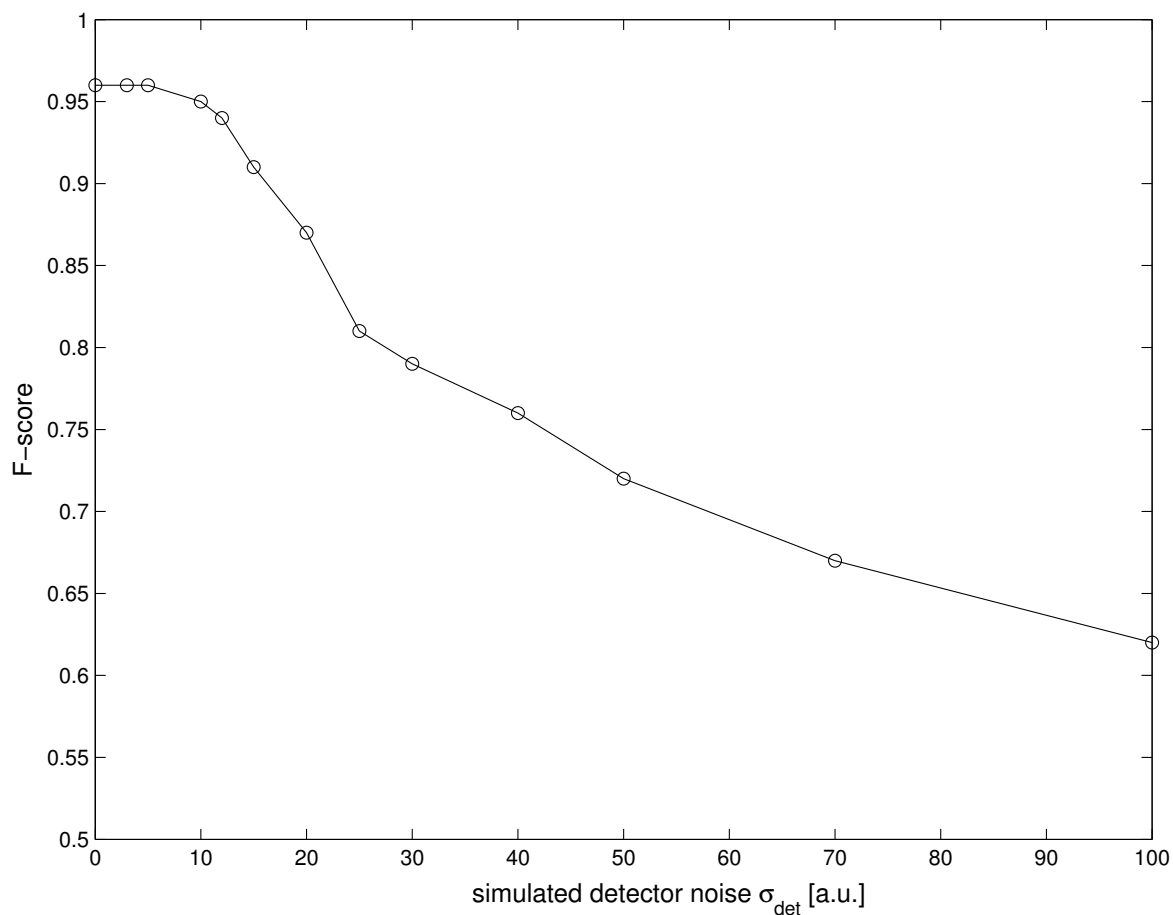

**S 7: Feature finding performance with respect to varying degrees of simulated detector noise.** For each simulated detector noise setting, the `noise_threshold_int` parameter was chosen accordingly as an optimal setting. Additionally, only mass traces with a signal-to-noise ratio of at least 10 were accepted.

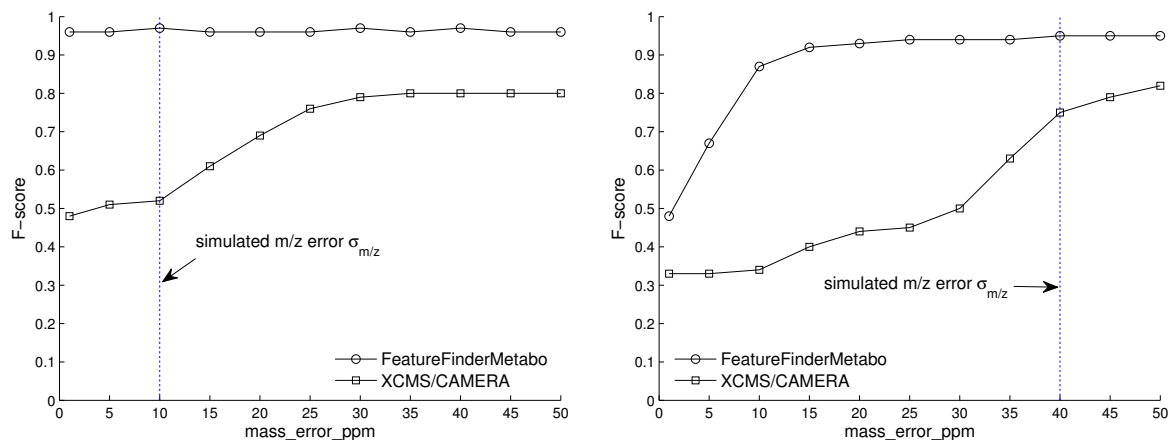

**S 8: Feature finding performance comparison with respect to varying settings of the mass\_error\_ppm**

**parameter.** Feature detection runs were performed on datasets with a simulated m/z error  $\sigma_{m/z} = 10$  ppm (left plot) and  $\sigma_{m/z} = 40$  ppm (right plot). Our algorithm's mass\_error\_ppm parameter and the corresponding parameter in XCMS/CAMERA were varied between 1 and 50 ppm, respectively.

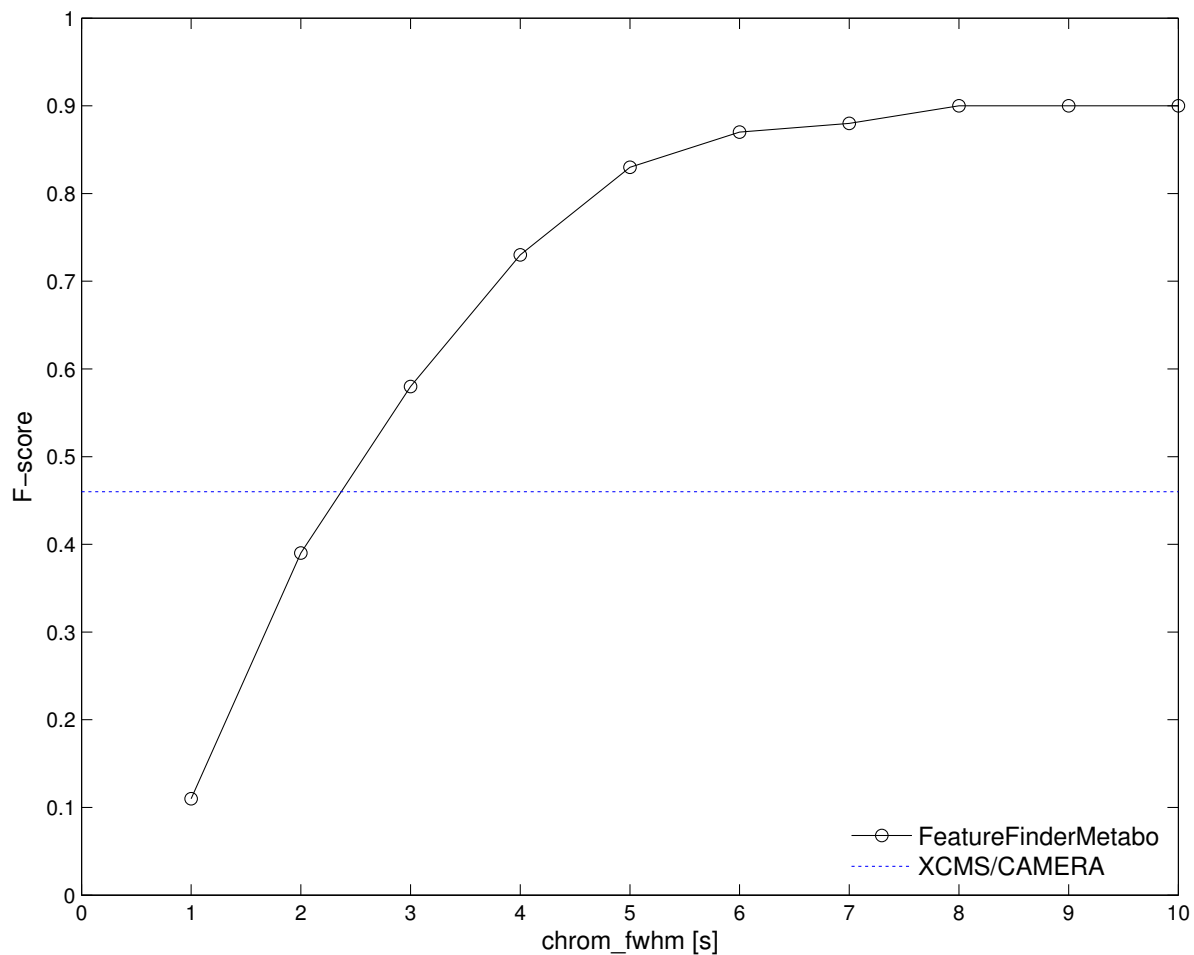

**S 9: Feature finding performance with respect to varying settings of the chrom\_fwhm parameter.** Feature detection runs were performed on a dataset with elution profiles simulated with heavy distortion. The chrom\_fwhm parameter was varied between 1 and 10 seconds. Since XCMS/CAMERA does not offer a smoothing parameter corresponding to chrom\_fwhm, we conducted a single run with the parameter *peakwidth* set to the interval [3, 30] seconds, allowing only chromatographic peaks within this range. The set of chromatographic peaks resulting from our algorithm were also filtered by this criterion.

**S 10: Feature intensities for spiked-in compounds.** The first row contains the Pearson correlations between the concentrations and the corresponding feature intensities for each standard compound.

| Compound                                   | C3-Carnitine                            | Nialamide                                    | Sulfadimethoxine                        | Reserpine                               | Terfenadine                             | C16-Carnitine<br>(Palmitoylcarnitine)   | C18-Carnitine<br>(Stearoylcarnitine)    |
|--------------------------------------------|-----------------------------------------|----------------------------------------------|-----------------------------------------|-----------------------------------------|-----------------------------------------|-----------------------------------------|-----------------------------------------|
| <b>Correlation</b>                         | 0.9994                                  | 0.9957                                       | 0.987                                   | 0.9987                                  | 0.9994                                  | 0.9975                                  | 0.9803                                  |
| <b>Stock Solution Concentration [mg/L]</b> | intensity mean +/- standard deviation   |                                              |                                         |                                         |                                         |                                         |                                         |
| 0                                          | not detected                            | not detected                                 | not detected                            | not detected                            | not detected                            | not detected                            | not detected                            |
| 0.01                                       | not detected                            | $6.3 \times 10^1$ +/- 0 (*)                  | $2.5 \times 10^2$ +/- $2.7 \times 10^1$ | $8.0 \times 10^1$ +/- 8.3               | $3.8 \times 10^2$ +/- $4.3 \times 10^1$ | $2.2 \times 10^2$ +/- 0.0 (*)           | not detected                            |
| 0.02                                       | not detected                            | $1.1 \times 10^2$ +/- $1.1 \times 10^1$      | $4.8 \times 10^2$ +/- $7.2 \times 10^1$ | $1.4 \times 10^2$ +/- 9.3               | $6.4 \times 10^2$ +/- $8.4 \times 10^1$ | $3.6 \times 10^2$ +/- 3.4               | $4.5 \times 10^2$ +/- 7.3               |
| 0.05                                       | not detected                            | $2.5 \times 10^2$ +/- $1.1 \times 10^1$      | $1.2 \times 10^3$ +/- $9.7 \times 10^1$ | $3.6 \times 10^2$ +/- $3.8 \times 10^1$ | $1.8 \times 10^3$ +/- $1.5 \times 10^2$ | $6.9 \times 10^2$ +/- 8.8               | $9.1 \times 10^2$ +/- $1.9 \times 10^1$ |
| 0.1                                        | not detected                            | $2.0 \times 10^2$ +/- $1.2 \times 10^2$ (**) | $2.3 \times 10^3$ +/- $9.5 \times 10^1$ | $8.3 \times 10^2$ +/- $2.5 \times 10^1$ | $3.6 \times 10^3$ +/- $1.3 \times 10^2$ | $2.5 \times 10^3$ +/- $1.9 \times 10^1$ | $3.2 \times 10^3$ +/- $1.8 \times 10^2$ |
| 0.2                                        | not detected                            | $1.0 \times 10^3$ +/- $9.9 \times 10^1$      | $3.8 \times 10^3$ +/- $3.3 \times 10^2$ | $2.1 \times 10^3$ +/- $6.7 \times 10^1$ | $7.7 \times 10^3$ +/- $2.7 \times 10^2$ | $6.4 \times 10^3$ +/- $4.7 \times 10^1$ | $8.0 \times 10^3$ +/- $1.2 \times 10^2$ |
| 0.5                                        | not detected                            | $2.5 \times 10^3$ +/- $1.1 \times 10^2$      | $8.7 \times 10^3$ +/- $7.8 \times 10^2$ | $3.9 \times 10^3$ +/- $3.0 \times 10^2$ | $1.4 \times 10^4$ +/- $5.0 \times 10^2$ | $1.3 \times 10^4$ +/- $1.0 \times 10^2$ | $1.8 \times 10^4$ +/- $2.1 \times 10^2$ |
| 1                                          | $3.1 \times 10^2$ +/- $1.4 \times 10^1$ | $4.5 \times 10^3$ +/- $1.3 \times 10^2$      | $1.7 \times 10^4$ +/- $1.2 \times 10^3$ | $8.1 \times 10^3$ +/- $7.2 \times 10^2$ | $2.5 \times 10^4$ +/- $1.5 \times 10^3$ | $4.8 \times 10^4$ +/- $1.4 \times 10^2$ | $5.6 \times 10^4$ +/- $5.1 \times 10^2$ |
| 2                                          | $5.3 \times 10^2$ +/- $2.1 \times 10^1$ | $9.7 \times 10^3$ +/- $1.1 \times 10^3$      | $3.4 \times 10^4$ +/- $1.5 \times 10^3$ | $1.9 \times 10^4$ +/- $1.2 \times 10^3$ | $5.5 \times 10^4$ +/- $1.3 \times 10^3$ | $6.9 \times 10^4$ +/- $5.9 \times 10^2$ | $9.3 \times 10^4$ +/- $5.7 \times 10^3$ |
| 5                                          | $1.1 \times 10^3$ +/- $1.0 \times 10^2$ | $2.2 \times 10^4$ +/- $2.2 \times 10^3$      | $7.2 \times 10^4$ +/- $4.1 \times 10^2$ | $5.7 \times 10^4$ +/- $2.3 \times 10^3$ | $1.4 \times 10^5$ +/- $1.8 \times 10^3$ | $1.5 \times 10^5$ +/- $2.3 \times 10^3$ | $2.3 \times 10^5$ +/- $6.4 \times 10^3$ |
| 10                                         | $2.0 \times 10^3$ +/- $1.3 \times 10^2$ | $3.7 \times 10^4$ +/- $1.4 \times 10^3$      | $1.1 \times 10^5$ +/- $4.0 \times 10^3$ | $1.0 \times 10^5$ +/- $1.1 \times 10^3$ | $2.6 \times 10^5$ +/- $4.0 \times 10^3$ | $3.2 \times 10^5$ +/- $1.2 \times 10^3$ | $3.2 \times 10^5$ +/- $2.0 \times 10^3$ |

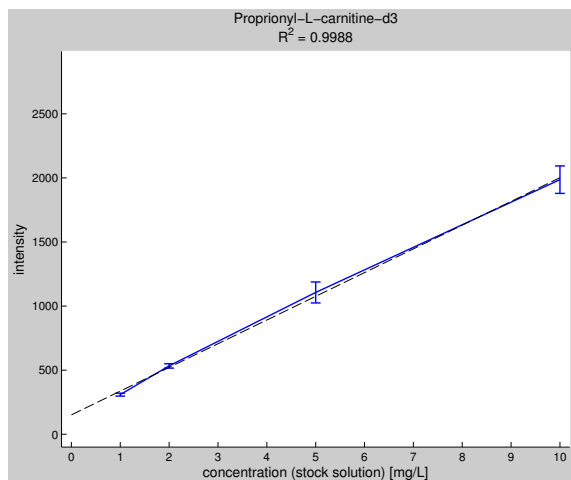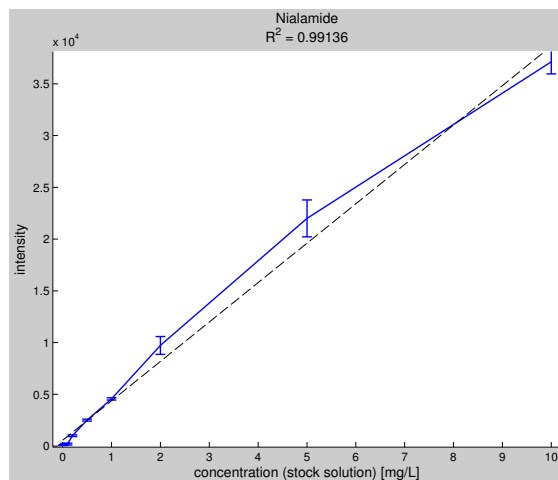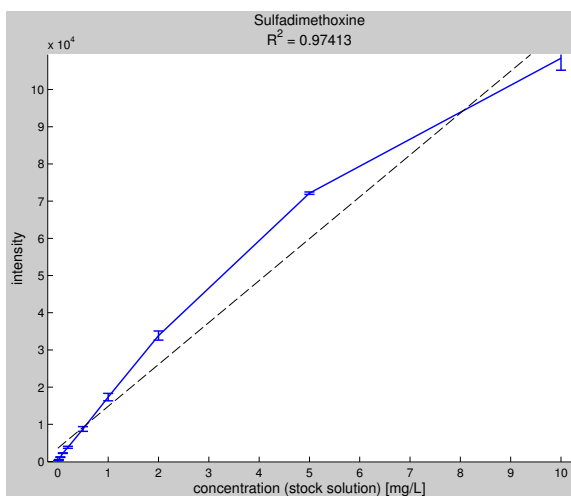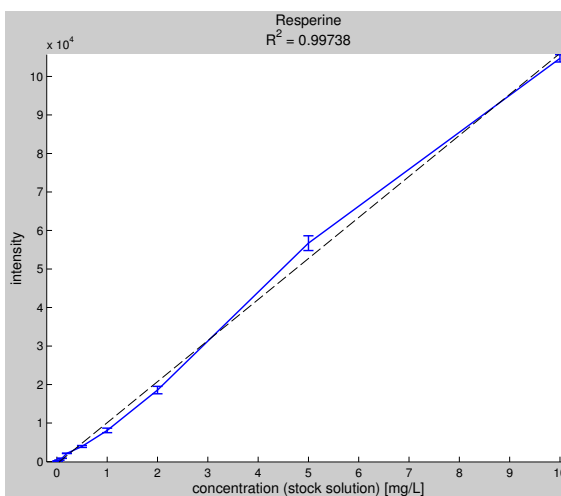

**S 11: Relationship between stock solution concentrations and feature intensities for Propionyl-L-carnitine-d3, Nialamide, Sulfadimethoxine, and Reserpine.**

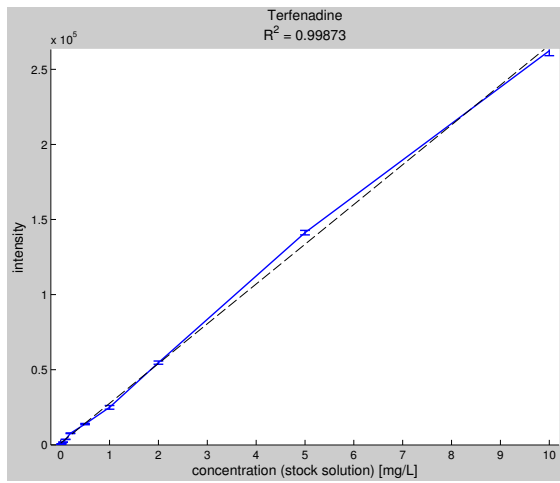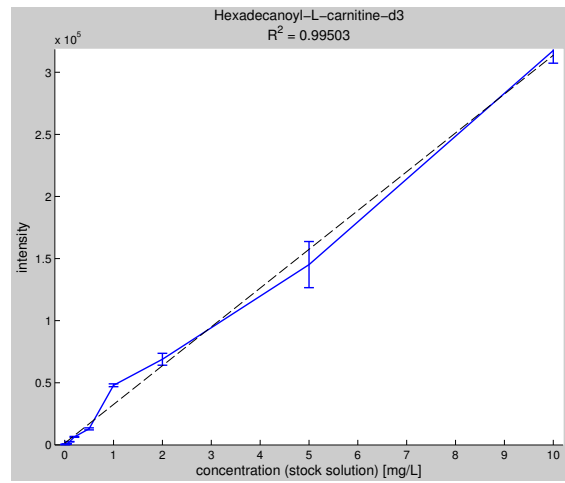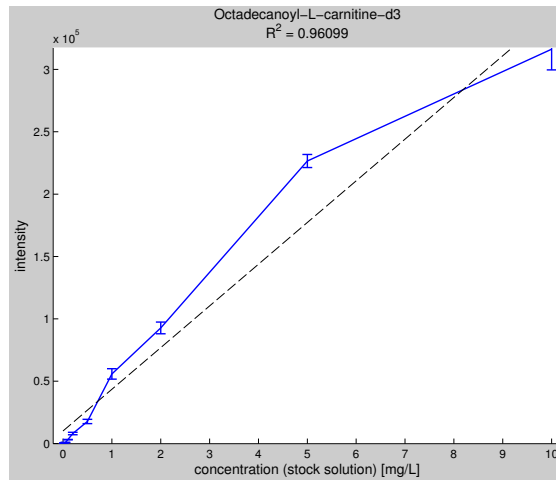

**S 12: Relationship between stock solution concentrations and feature intensities for Terfenadine, Hexadecanoyl-L-carnitine-d3, and Octadecanoyl-L-carnitine-d3.**

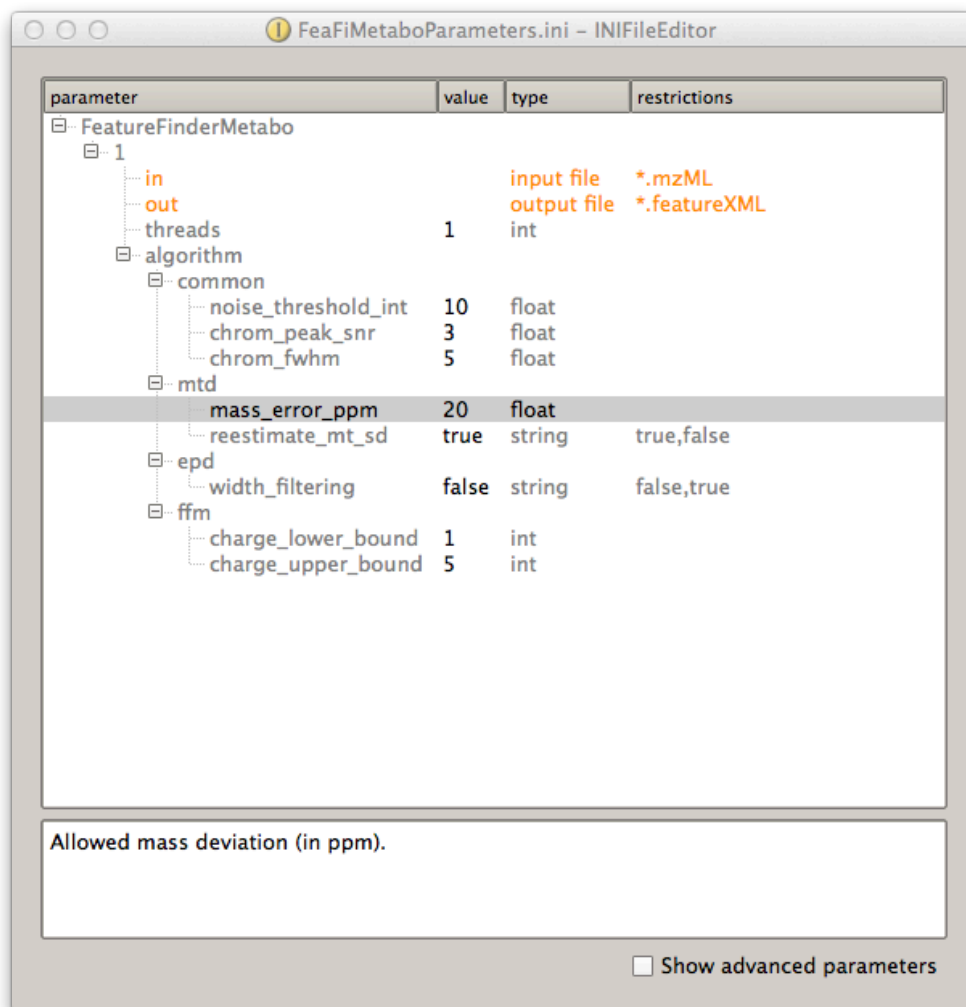

**S 13: Snapshot of the INIFileEditor window.** The parameters for the FeatureFinderMetabo tool are easily changed with the INIFileEditor tool of OpenMS.
